# Supplementary material
Source: PubMed Central journal article supplement (PMC2953914)
Supplement: supp_M110.000323_FigureS1.pdf [file supp_M110.000323_FigureS1.pdf]

## Figure S1

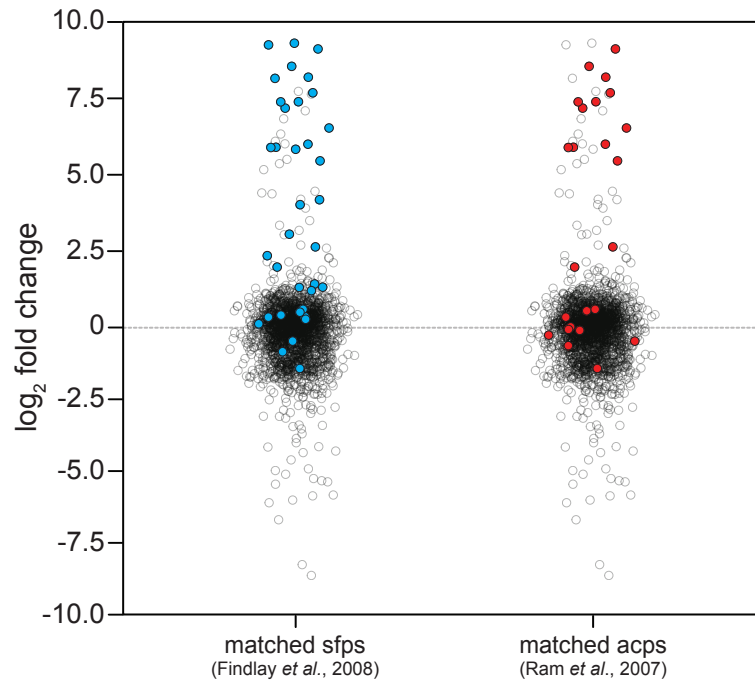

**Figure S1.** Comparison of male vs. female protein ratios of  $w^{1118}$  flies with datasets of previously identified sfps (12) and acps (45). Male - specific enrichment was found for matched sfps (blue dots, on average ~14 fold, n=36) and matched acps (red dots, on average ~12 fold, n=24) compared to male vs. female protein ratios of  $w^{1118}$  flies (n=2106). Note that some proteins overlap between the acp and sfp datasets.
