# Supplementary material
Source: PubMed Central journal article supplement (PMC2953914)
Supplement: supp_M110.000323_Table_S1.pdf [file supp_M110.000323_Table_S1.pdf]

## Supplementary Table 1

Tissue-specific gene expression data are retrieved from FlyAtlas (Chintapalli et al., 2007).

**Region 1**  $\{w^{1118} \log_2 (M/F) > 1.5; tud^1 \text{ progeny } \log_2 (M/F) > 1.5\}$

| Flybase ID  | Gene symbol | Protein name                          | $\log_2 (M/F)$<br>$w^{1118}$ | $\log_2 (M/F)$<br><i>tudor</i><br>progeny | mRNA enrichment<br>(accessory gland) <sup>a</sup> | mRNA enrichment<br>(testis) <sup>b</sup> | mRNA enrichment<br>(ovary) <sup>c</sup> |
|-------------|-------------|---------------------------------------|------------------------------|-------------------------------------------|---------------------------------------------------|------------------------------------------|-----------------------------------------|
| FBgn0002855 | Acp26Aa     | Accessory gland-specific peptide 26Aa | 8.09                         | 8.08                                      | 14.00                                             | 0.10                                     | 0.00                                    |
| FBgn0011559 | Acp36DE     | Accessory gland peptide 36DE          | 9.00                         | 7.80                                      | 7.50                                              | 0.10                                     | 0.00                                    |
| FBgn0034153 | Acp53C14b   | Acp53C14b                             | 5.82                         | 3.60                                      | 5.90                                              | 0.10                                     | 0.00                                    |
| FBgn0015586 | Acp76A      | Accessory gland-specific peptide 76A  | 6.45                         | 6.04                                      | 16.00                                             | 0.10                                     | 0.00                                    |
| FBgn0038985 | bond        | james bond                            | 3.86                         | 2.17                                      | 1.60                                              | 2.00                                     | 0.30                                    |
| FBgn0038032 | CG10096     | CG10096                               | 4.32                         | 2.49                                      | 0.00                                              | 0.00                                     | 0.00                                    |
| FBgn0038033 | CG10097     | CG10097                               | 3.45                         | 1.56                                      | 0.00                                              | 0.00                                     | 0.00                                    |
| FBgn0032055 | CG13091     | CG13091                               | 3.00                         | 1.84                                      | 0.00                                              | 0.00                                     | 0.00                                    |
| FBgn0040376 | CG13759     | CG13759                               | 4.35                         | 3.18                                      | 69.3                                              | 0.70                                     | 0.00                                    |
| FBgn0250847 | CG14034     | CG14034                               | 6.74                         | 4.72                                      | 49.70                                             | 0.10                                     | 0.00                                    |
| FBgn0034417 | CG15117     | CG15117                               | 4.13                         | 3.58                                      | 41.30                                             | 3.80                                     | 0.20                                    |
| FBgn0032275 | CG17097     | CG17097                               | 8.44                         | 7.82                                      | 11.00                                             | 0.10                                     | 0.00                                    |
| FBgn0040011 | CG17494     | CG17494                               | 1.93                         | 1.82                                      | 0.80                                              | 2.60                                     | 1.80                                    |
| FBgn0038919 | CG17843     | CG17843                               | 7.58                         | 5.83                                      | 72.60                                             | 0.20                                     | 0.00                                    |
| FBgn0030827 | CG18258     | CG18258                               | 7.00                         | 7.01                                      | 3.70                                              | 0.20                                     | 0.00                                    |
| FBgn0050395 | CG30395     | CG30395                               | 5.81                         | 4.87                                      | 49.00                                             | 0.40                                     | 0.00                                    |
| FBgn0051872 | CG31872     | CG31872                               | 7.09                         | 6.52                                      | 32.30                                             | 0.10                                     | 0.00                                    |
| FBgn0032122 | CG31883     | CG31883                               | 5.76                         | 5.89                                      | 41.20                                             | 0.10                                     | 0.00                                    |
| FBgn0054051 | CG34051     | CG34051                               | 5.92                         | 5.10                                      | 46.40                                             | 0.10                                     | 0.00                                    |
| FBgn0030828 | CG5162      | CG5162                                | 3.97                         | 2.45                                      | 2.50                                              | 0.10                                     | 0.00                                    |
| FBgn0036970 | CG6289      | CG6289                                | 7.30                         | 5.34                                      | 2.60                                              | 0.10                                     | 0.00                                    |
| FBgn0036969 | CG6663      | CG6663                                | 9.13                         | 6.97                                      | 4.00                                              | 0.10                                     | 0.00                                    |

**Region 1 continued**

|             |        |                             |      |      |       |      |      |
|-------------|--------|-----------------------------|------|------|-------|------|------|
| FBgn0000592 | Est-6  | Esterase 6                  | 3.02 | 1.60 | 1.70  | 0.10 | 0.00 |
| FBgn0032129 | jp     | junctophilin                | 1.54 | 1.63 | 0.40  | 0.20 | 0.10 |
| FBgn0024211 | mfas   | midline fasciclin           | 1.95 | 2.52 | 24.00 | 1.30 | 0.30 |
| FBgn0043530 | Obp51a | Odorant-binding protein 51a | 8.05 | 2.12 | 2.90  | 0.10 | 0.00 |
| FBgn0028987 | Spn2   | Serine protease inhibitor 2 | 5.38 | 6.58 | 13.60 | 0.10 | 0.00 |
| FBgn0028986 | Spn3   | Serine protease inhibitor 3 | 7.29 | 6.45 | 15.10 | 0.10 | 0.00 |

**Region 2**  $\{w^{1118} \log_2 (M/F) > 1.5; tud^1 \text{ progeny } -1.5 \log_2 (M/F) \leq 1.5\}$ 

| Flybase ID  | Gene symbol | Protein name                 | $\log_2 (M/F)$<br>$w^{1118}$ | $\log_2 (M/F)$<br>$tud^1$<br>progeny | mRNA enrichment<br>(accessory gland) <sup>a</sup> | mRNA enrichment<br>(testis) <sup>b</sup> | mRNA enrichment<br>(ovary) <sup>c</sup> |
|-------------|-------------|------------------------------|------------------------------|--------------------------------------|---------------------------------------------------|------------------------------------------|-----------------------------------------|
| FBgn0036650 | Baldspot    | Baldspot                     | 2.00                         | 1.32                                 | 0.10                                              | 0.60                                     | 0.60                                    |
| FBgn0039311 | CG10513     | CG10513                      | 1.64                         | -0.50                                | 0.00                                              | 0.20                                     | 0.00                                    |
| FBgn0034356 | CG10924     | CG10924                      | 1.86                         | 0.20                                 | 0.00                                              | 0.00                                     | 0.00                                    |
| FBgn0053523 | CG33523     | CG33523                      | 1.75                         | 1.45                                 | 0.30/2.00                                         | 1.60/3.40                                | 0.20/0.80                               |
| FBgn0038373 | CG4546      | CG4546                       | 7.63                         | 0.00                                 | 0.00                                              | 10.00                                    | 0.00                                    |
| FBgn0034229 | CG4847      | CG4847                       | 2.61                         | 0.63                                 | 19.80                                             | 0.10                                     | 0.00                                    |
| FBgn0039553 | CG5017      | CG5017                       | 5.10                         | -0.60                                | 0.00                                              | 8.90                                     | 0.00                                    |
| FBgn0038074 | CG6188      | CG6188                       | 2.13                         | 0.05                                 | 0.40                                              | 0.10                                     | 0.00                                    |
| FBgn0036415 | CG7768      | CG7768                       | 6.01                         | -0.40                                | 1.00/0.00                                         | 1.30/7.40                                | 0.40/0.00                               |
| FBgn0037765 | CG9458      | CG9458                       | 1.81                         | 0.15                                 | 0.00                                              | 0.00                                     | 0.00                                    |
| FBgn0086907 | Cyt-c-d     | Cytochrome c distal          | 5.93                         | 0.39                                 | 0.10                                              | 8.30                                     | 0.00                                    |
| FBgn0000615 | exu         | exuperantia                  | 2.12                         | 0.09                                 | 0.00/0.00                                         | 5.00/1.80                                | 0.00/1.70                               |
| FBgn0001112 | Gld         | Glucose dehydrogenase        | 4.14                         | 1.42                                 | 2.00                                              | 0.10                                     | 0.00                                    |
| FBgn0010041 | GstD5       | Glutathione S transferase D5 | 3.14                         | 0.28                                 | 5.40                                              | 11.30                                    | 0.20                                    |
| FBgn0031728 | Hsp60C      | Hsp60C                       | 6.25                         | -1.20                                | 0.00                                              | 6.20                                     | 0.00                                    |

**Region 2 continued**

|             |           |                             |      |       |       |       |      |
|-------------|-----------|-----------------------------|------|-------|-------|-------|------|
| FBgn0001230 | Hsp68     | Heat shock protein 68       | 2.66 | 0.67  | 0.00  | 9.30  | 0.20 |
| FBgn0033268 | Obp44a    | Obp44a                      | 2.09 | 0.40  | 0.00  | 3.30  | 0.00 |
| FBgn0069354 | Porin2    | Porin2                      | 9.18 | -0.70 | 0.00  | 12.90 | 0.00 |
| FBgn0033518 | Prx2540-2 | Peroxiredoxin 2540          | 1.73 | 0.00  | 0.10  | 4.20  | 0.10 |
| FBgn0028988 | Spn1      | Serine protease inhibitor 1 | 2.32 | 1.09  | 25.80 | 0.10  | 0.00 |
| FBgn0044812 | TotC      | Turandot C                  | 1.85 | -0.60 | 0.00  | 0.00  | 0.00 |
| FBgn0035965 | Use1      | Use1                        | 2.56 | -0.20 | 2.30  | 0.90  | 1.60 |
| FBgn0004003 | wbl       | windbeutel                  | 2.25 | 1.31  | 30.10 | 0.40  | 0.40 |

**Region 4**  $\{w^{1118} -1.5 \leq \log_2 (M/F) \leq 1.5; tud^1 \text{ progeny } \log_2 (M/F) < -1.5\}$ 

| Flybase ID  | Gene symbol | Protein name                              | $\log_2 (M/F)$<br>$w^{1118}$ | $\log_2 (M/F)$<br><i>tudor</i><br>progeny | mRNA enrichment<br>(accessory gland) <sup>a</sup> | mRNA enrichment<br>(testis) <sup>b</sup> | mRNA enrichment<br>(ovary) <sup>c</sup> |
|-------------|-------------|-------------------------------------------|------------------------------|-------------------------------------------|---------------------------------------------------|------------------------------------------|-----------------------------------------|
| FBgn0037288 | CG14661     | CG14661                                   | -0.70                        | -1.60                                     | 0.00                                              | 0.00                                     | 0.00                                    |
| FBgn0040001 | CG17374     | CG17374                                   | -0.40                        | -1.70                                     | 0.00                                              | 0.00                                     | 0.00                                    |
| FBgn0038973 | CG18594     | CG18594                                   | -0.80                        | -2.30                                     | 0.00                                              | 0.00                                     | 0.00                                    |
| FBgn0050291 | CG30291     | CG30291                                   | 0.65                         | -1.80                                     | 3.30                                              | 0.50                                     | 1.20                                    |
| FBgn0035989 | CG3967      | CG3967                                    | 0.95                         | -1.50                                     | 2.00/1.30                                         | 1.60/0.30                                | 2.20/2.20                               |
| FBgn0032235 | CG5096      | CG5096                                    | -0.10                        | -1.60                                     | 0.30/0.00                                         | 0.00/0.00                                | 0.40/0.00                               |
| FBgn0035926 | CG5804      | CG5804                                    | -0.50                        | -1.60                                     | 0.00                                              | 0.00                                     | 0.00                                    |
| FBgn0039184 | CG6432      | CG6432                                    | 0.69                         | -1.80                                     | 0.10                                              | 0.00                                     | 0.00                                    |
| FBgn0250836 | CG8628      | CG8628                                    | -0.30                        | -1.60                                     | 0.00                                              | 0.00                                     | 0.00                                    |
| FBgn0023081 | gek         | genghis khan                              | -0.40                        | -4.30                                     | 0.70                                              | 0.30                                     | 1.70                                    |
| FBgn0004828 | His3.3B     | Histone H3.3B                             | 0.17                         | -1.50                                     | 1.10                                              | 0.30                                     | 1.40                                    |
| FBgn0028582 | lqf         | liquid facets                             | -0.10                        | -2.40                                     | 1.60                                              | 0.20                                     | 0.70                                    |
| FBgn0002565 | Lsp2        | Larval serum protein 2                    | 0.00                         | -3.60                                     | 0.60                                              | 0.40                                     | 0.30                                    |
| FBgn0002940 | ninaE       | neither inactivation nor afterpotential E | 0.09                         | -1.50                                     | 0.00                                              | 0.00                                     | 0.00                                    |
| FBgn0039678 | Obp99a      | Odorant-binding protein 99a               | -0.70                        | -6.50                                     | 0.00                                              | 3.20                                     | 0.10                                    |
| FBgn0004867 | sop         | string of pearls                          | -1.30                        | -2.10                                     | 2.40                                              | 0.30                                     | 0.90                                    |

**Region 4 continued**

|             |      |           |       |       |      |      |      |
|-------------|------|-----------|-------|-------|------|------|------|
| FBgn0015544 | spag | spaghetti | -0.70 | -2.40 | 0.50 | 1.50 | 2.00 |
|-------------|------|-----------|-------|-------|------|------|------|

**Region 5**  $\{w^{1118} \leq \log_2(M/F) < -1.5; tud^1 \text{ progeny } \log_2(M/F) < -1.5\}$ 

| Flybase ID  | Gene symbol | Protein name        | $\log_2(M/F)$<br>$w^{1118}$ | $\log_2(M/F)$<br><i>tudor</i><br>progeny | mRNA enrichment<br>(accessory gland) <sup>a</sup> | mRNA enrichment<br>(testis) <sup>b</sup> | mRNA enrichment<br>(ovary) <sup>c</sup> |
|-------------|-------------|---------------------|-----------------------------|------------------------------------------|---------------------------------------------------|------------------------------------------|-----------------------------------------|
| FBgn0000427 | dec-1       | defective chorion 1 | -6.20                       | -2.00                                    | 0.00                                              | 0.00                                     | 1.50                                    |
| FBgn0030086 | CG7033      | CG7033              | -2.10                       | -2.70                                    | 0.80                                              | 0.30                                     | 1.40                                    |
| FBgn0029172 | Fad2        | Fad2                | -5.40                       | -6.20                                    | 0.00                                              | 0.00                                     | 0.00                                    |
| FBgn0003022 | Ote         | Otefin              | -1.50                       | -1.80                                    | 0.10                                              | 0.40                                     | 2.50                                    |
| FBgn0004045 | Yp1         | Yolk protein 1      | -4.50                       | -6.20                                    | 0.00                                              | 0.00                                     | 0.60                                    |
| FBgn0005391 | Yp2         | Yolk protein 2      | -5.40                       | -5.10                                    | 0.00                                              | 0.00                                     | 0.60                                    |
| FBgn0004047 | Yp3         | Yolk protein 3      | -7.60                       | -6.80                                    | 0.00                                              | 0.00                                     | 0.40                                    |

**Region 6**  $\{w^{1118} \log_2(M/F) < -1.5; tud^1 \text{ progeny } -1.5 \leq \log_2(M/F) \leq 1.5\}$ 

| Flybase ID  | Gene symbol     | Protein name                  | $\log_2(M/F)$<br>$w^{1118}$ | $\log_2(M/F)$<br><i>tudor</i><br>progeny | mRNA enrichment<br>(accessory gland) <sup>a</sup> | mRNA enrichment<br>(testis) <sup>b</sup> | mRNA enrichment<br>(ovary) <sup>c</sup> |
|-------------|-----------------|-------------------------------|-----------------------------|------------------------------------------|---------------------------------------------------|------------------------------------------|-----------------------------------------|
| FBgn0087040 | $\alpha$ Tub67C | $\alpha$ -Tubulin at 67C      | -7.90                       | -0.90                                    | 0.00                                              | 0.00                                     | 1.70                                    |
| FBgn0250848 | 26-29-p         | 26-29kD-proteinase            | -3.10                       | -0.20                                    | 0.10                                              | 0.30                                     | 1.30                                    |
| FBgn0000043 | Act42A          | Actin 42A                     | -2.00                       | 0.81                                     | 0.70                                              | 1.30                                     | 0.90                                    |
| FBgn0014455 | Ahcy13          | Adenosyl-homocysteinase at 13 | -1.60                       | -0.60                                    | 1.10                                              | 0.10                                     | 1.30                                    |
| FBgn0034366 | Atg7            | Autophagy-specific gene 7     | -1.60                       | 0.60                                     | 1.30                                              | 0.60                                     | 1.60                                    |
| FBgn0000181 | bic             | bicaudal                      | -1.50                       | -0.40                                    | 6.50                                              | 0.90                                     | 0.90                                    |
| FBgn0011570 | cpb             | Capping protein beta          | -2.00                       | 0.91                                     | 1.50                                              | 0.40                                     | 1.60                                    |
| FBgn0015019 | Ccty            | Ccty                          | -1.80                       | -1.40                                    | 0.40                                              | 0.40                                     | 1.50                                    |
| FBgn0035630 | CG10576         | CG10576                       | -1.90                       | -0.80                                    | 2.00                                              | 0.70                                     | 1.30                                    |
| FBgn0037930 | CG14715         | CG14715                       | -2.20                       | -0.50                                    | 0.80                                              | 0.20                                     | 1.30                                    |
| FBgn0040010 | CG17493         | CG17493                       | -1.50                       | -0.30                                    | 1.00                                              | 0.20                                     | 2.00                                    |

**Region 6 continued**

|             |          |                                           |       |       |           |           |           |
|-------------|----------|-------------------------------------------|-------|-------|-----------|-----------|-----------|
| FBgn0031148 | CG1753   | CG1753                                    | -2.80 | 0.27  | 0.90      | 0.10      | 1.80      |
| FBgn0042134 | CG18811  | CG18811                                   | -2.60 | 0.00  | 1.30      | 0.50      | 2.30      |
| FBgn0029882 | CG3226   | CG3226                                    | -1.60 | -0.30 | 0.80      | 0.70      | 1.70      |
| FBgn0032949 | CG3305   | CG3305                                    | -1.80 | -0.90 | 1.70      | 0.70      | 1.00      |
| FBgn0053123 | CG33123  | CG33123                                   | -1.50 | -0.20 | 1.80      | 0.30      | 1.60      |
| FBgn0259682 | CG42351  | CG42351                                   | -3.70 | -0.90 | 0.00/0.00 | 0.10/0.00 | 0.40/1.70 |
| FBgn0032444 | CG5525   | CG5525                                    | -2.00 | 0.00  | 0.50      | 0.40      | 1.50      |
| FBgn0036548 | CG5931   | CG5931                                    | -1.50 | 0.64  | 1.20      | 0.50      | 2.30      |
| FBgn0026079 | CG6133   | CG6133                                    | -1.50 | 0.00  | 1.70      | 0.50      | 1.70      |
| FBgn0035901 | CG6745   | CG6745                                    | -1.70 | 0.00  | 0.70      | 0.50      | 2.10      |
| FBgn0030086 | CG7033   | CG7033                                    | -2.00 | 0.10  | 0.80      | 0.30      | 1.40      |
| FBgn0032026 | CG7627   | CG7627                                    | -1.70 | -0.20 | 0.20      | 0.10      | 2.80      |
| FBgn0039735 | CG7911   | CG7911                                    | -1.80 | 0.23  | 1.00/1.00 | 0.30/0.80 | 1.30/1.80 |
| FBgn0037624 | CG8223   | CG8223                                    | -3.80 | -0.10 | 0.60      | 0.10      | 2.20      |
| FBgn0033342 | CG8258   | CG8258                                    | -2.00 | -0.10 | 0.60      | 0.40      | 1.40      |
| FBgn0037756 | CG8507   | CG8507                                    | -1.80 | 0.00  | 0.70      | 0.30      | 1.90      |
| FBgn0030672 | CG9281   | CG9281                                    | -1.50 | 0.00  | 2.60      | 0.10      | 1.20      |
| FBgn0035726 | CG9953   | CG9953                                    | -1.90 | -0.70 | 0.60      | 0.30      | 1.10      |
| FBgn0015610 | Caf1     | Chromatin<br>assembly factor<br>1 subunit | -2.70 | -0.70 | 0.40      | 0.30      | 1.70      |
| FBgn0026084 | cib      | ciboulot                                  | -1.50 | 0.22  | 0.80/0.30 | 1.20/0.50 | 1.50/1.30 |
| FBgn0027055 | CSN3     | COP9 complex<br>homolog subunit<br>3      | -2.20 | 0.48  | 1.60      | 1.20      | 1.50      |
| FBgn0013770 | Cp1      | Cysteine<br>proteinase-1                  | -1.50 | -0.40 | 1.50      | 0.50      | 0.90      |
| FBgn0250837 | dUTPase  | Deoxyuridine<br>triphosphatase            | -4.90 | -1.10 | 0.30      | 1.00      | 2.30      |
| FBgn0032198 | eEF1δ    | eEF1δ                                     | -1.60 | -0.60 | 1.50      | 0.40      | 1.20      |
| FBgn0015218 | eIF-4E   | Eukaryotic<br>initiation factor<br>4E     | -2.40 | -0.80 | 1.60      | 0.80      | 1.60      |
| FBgn0000986 | Fs(2)Ket | Female sterile<br>(2) Ketel               | -2.70 | 0.62  | 0.20      | 0.10      | 2.30      |
| FBgn0003062 | Fib      | Fibrillarin                               | -1.80 | 0.41  | 1.40      | 0.50      | 1.70      |

**Region 6 continued**

|             |                |                                                              |       |       |      |      |      |
|-------------|----------------|--------------------------------------------------------------|-------|-------|------|------|------|
| FBgn0013269 | FK506-bp1      | FK506-binding protein 1                                      | -2.60 | 0.77  | 0.80 | 0.20 | 2.10 |
| FBgn0015393 | hoip           | hoi-polloi                                                   | -1.70 | -0.10 | 0.60 | 0.10 | 1.50 |
| FBgn0087013 | Kary $\beta$ 3 | Karyopherin $\beta$ 3                                        | -1.60 | -1.10 | 1.20 | 0.50 | 1.10 |
| FBgn0011638 | La             | La autoantigen-like                                          | -1.80 | -0.80 | 0.50 | 0.20 | 1.60 |
| FBgn0030608 | Lsd-2          | Lipid storage droplet-2                                      | -1.50 | -0.50 | 0.40 | 0.00 | 1.40 |
| FBgn0034282 | Map-modulin    | Mapmodulin                                                   | -1.60 | 0.18  | 0.50 | 0.80 | 2.00 |
| FBgn0004419 | me31B          | maternal expression at 31B                                   | -4.90 | 0.17  | 0.20 | 0.20 | 1.50 |
| FBgn0026252 | msk            | moleskin                                                     | -1.70 | -0.30 | 0.90 | 0.30 | 1.80 |
| FBgn0025390 | Mur2B          | Mucin related 2B                                             | -4.00 | 1.38  | 0.10 | 0.00 | 1.80 |
| FBgn0005655 | mus209         | mutagen-sensitive 209                                        | -5.60 | 0.73  | 0.00 | 0.10 | 1.80 |
| FBgn0086904 | Nacalpha       | Nascent polypeptide associated complex protein alpha subunit | -1.60 | 0.00  | 1.70 | 0.30 | 1.10 |
| FBgn0010488 | NAT1           | NAT1                                                         | -1.50 | 0.13  | 0.80 | 0.90 | 1.40 |
| FBgn0029148 | NHP2           | NHP2                                                         | -2.00 | 0.00  | 1.20 | 0.10 | 1.70 |
| FBgn0020392 | Nmt            | N-myristoyl transferase                                      | -1.50 | -0.60 | 0.20 | 0.40 | 1.80 |
| FBgn0026196 | nop5           | nop5                                                         | -1.80 | 1.21  | 0.80 | 0.10 | 2.20 |
| FBgn0038964 | Nop56          | Nop56                                                        | -1.80 | 0.64  | 1.00 | 0.20 | 1.80 |
| FBgn0259937 | Nop60B         | Nucleolar protein at 60B                                     | -1.80 | 0.66  | 0.60 | 0.10 | 2.00 |
| FBgn0016685 | Nlp            | Nucleoplasmin                                                | -2.20 | -0.40 | 1.40 | 0.30 | 1.40 |
| FBgn0015268 | Nap1           | Nucleosome assembly protein 1                                | -2.50 | 0.00  | 0.90 | 0.10 | 1.20 |
| FBgn0027868 | Nup107         | Nup107                                                       | -1.50 | -1.40 | 1.00 | 0.30 | 1.70 |
| FBgn0039302 | Nup358         | Nup358                                                       | -1.50 | 0.65  | 1.00 | 0.60 | 2.50 |
| FBgn0011823 | Pen            | Pendulin                                                     | -5.00 | -1.20 | 0.00 | 1.80 | 1.20 |
| FBgn0003042 | Pc             | Polycomb                                                     | -1.50 | -1.10 | 0.80 | 0.20 | 3.40 |
| FBgn0024733 | Qm             | Qm                                                           | -1.50 | -1.10 | 2.30 | 0.40 | 0.80 |

**Region 6 continued**

---

|             |        |                                                    |       |       |      |      |      |
|-------------|--------|----------------------------------------------------|-------|-------|------|------|------|
| FBgn0003204 | ras    | raspberry                                          | -1.90 | -0.50 | 1.20 | 0.10 | 1.60 |
| FBgn0015477 | Rme-8  | Receptor mediated endocytosis 8                    | -3.20 | -0.60 | 0.90 | 0.80 | 2.00 |
| FBgn0020618 | Rack1  | Receptor of activated protein kinase C 1           | -1.50 | -1.00 | 2.50 | 0.20 | 0.90 |
| FBgn0029133 | REG    | REG                                                | -1.80 | -0.40 | 1.90 | 0.80 | 1.30 |
| FBgn0010173 | RpA-70 | Replication Protein A 70                           | -2.90 | 0.00  | 0.30 | 0.50 | 1.90 |
| FBgn0032906 | RPA2   | Replication protein A2                             | -3.40 | -0.50 | 0.00 | 0.30 | 2.20 |
| FBgn0011703 | RnrL   | Ribonucleoside diphosphate reductase large subunit | -3.50 | -0.10 | 0.00 | 0.00 | 2.00 |
| FBgn0011272 | RpL13  | Ribosomal protein L13                              | -1.50 | -0.50 | 2.20 | 0.20 | 0.80 |
| FBgn0002607 | RpL19  | Ribosomal protein L19                              | -1.50 | -0.70 | 2.20 | 0.30 | 0.90 |
| FBgn0010410 | RpL27A | Ribosomal protein L27A                             | -1.60 | -0.50 | 2.20 | 0.30 | 0.80 |
| FBgn0086710 | RpL30  | Ribosomal protein L30                              | -1.60 | -0.40 | 2.50 | 0.20 | 0.90 |
| FBgn0037328 | RpL35A | Ribosomal protein L35A                             | -1.70 | -0.40 | 2.00 | 0.20 | 0.90 |
| FBgn0031980 | RpL36A | Ribosomal protein L36A                             | -1.50 | 0.00  | 2.10 | 0.20 | 0.80 |
| FBgn0014026 | RpL7A  | Ribosomal protein L7A                              | -1.50 | -0.70 | 2.30 | 0.20 | 1.00 |
| FBgn0000100 | RpLP0  | Ribosomal protein LP0                              | -1.60 | -0.70 | 2.10 | 0.20 | 0.90 |
| FBgn0034751 | RpS24  | Ribosomal protein S24                              | -1.70 | 0.00  | 2.30 | 0.20 | 0.90 |
| FBgn0002622 | RpS3   | Ribosomal protein S3                               | -1.50 | -0.40 | 2.30 | 0.30 | 0.80 |
| FBgn0003189 | r      | rudimentary                                        | -2.30 | 0.43  | 1.40 | 0.70 | 1.70 |
| FBgn0003257 | r-l    | rudimentary-like                                   | -2.50 | 0.73  | 0.90 | 0.10 | 2.10 |
| FBgn0000416 | Sap-r  | Saposin-related                                    | -2.10 | -0.70 | 1.60 | 0.60 | 0.80 |
| FBgn0029113 | Uba2   | Smt3 activating enzyme 2                           | -2.00 | 0.08  | 0.50 | 0.40 | 2.20 |

**Region 6 continued**

|             |        |                                   |       |       |      |      |      |
|-------------|--------|-----------------------------------|-------|-------|------|------|------|
| FBgn0037434 | snRNP2 | snRNP2                            | -1.60 | -0.10 | 2.00 | 0.30 | 1.80 |
| FBgn0037723 | SpdS   | Spermidine Synthase               | -1.90 | -1.30 | 0.20 | 0.10 | 2.00 |
| FBgn0051641 | stai   | stathmin                          | -5.50 | -0.50 | 0.10 | 0.60 | 1.80 |
| FBgn0003517 | sta    | stubarista                        | -1.50 | -1.00 | 2.50 | 0.20 | 0.90 |
| FBgn0010621 | Cct5   | T-complex Chaperonin 5            | -1.90 | 0.09  | 0.50 | 0.30 | 1.40 |
| FBgn0027329 | T-cp1ζ | T-cp1ζ                            | -1.90 | -0.70 | 0.60 | 0.20 | 1.70 |
| FBgn0037632 | Tcp-1η | Tcp-1η                            | -2.10 | -0.80 | 0.40 | 0.30 | 1.50 |
| FBgn0003676 | T-cp1  | Tcp1-like                         | -1.80 | 0.00  | 0.60 | 0.30 | 1.50 |
| FBgn0003732 | Top2   | Topoisomerase 2                   | -1.60 | 0.83  | 0.90 | 0.50 | 2.60 |
| FBgn0041775 | tral   | trailer hitch                     | -4.80 | -1.10 | 0.10 | 0.30 | 1.60 |
| FBgn0004889 | tws    | twins                             | -2.10 | 0.11  | 0.80 | 0.20 | 1.20 |
| FBgn0051852 | Tap42  | Two A-associated protein of 42kDa | -1.90 | 0.00  | 0.80 | 1.20 | 1.60 |
| FBgn0011327 | Uch-L3 | Ubiquitin C-terminal hydrolase    | -1.60 | -0.20 | 0.30 | 3.60 | 1.80 |
| FBgn0046214 | vig2   | vig2                              | -2.40 | 0.67  | 1.20 | 0.40 | 1.30 |

**Region 7** { $w^{1118}$   $\log_2$  (M/F) < -1.5;  $tud^1$  progeny  $\log_2$  (M/F) > 1.5}

| Flybase ID  | Gene symbol | Protein name                 | $\log_2$ (M/F) $w^{1118}$ | $\log_2$ (M/F) $tud^1$ progeny | mRNA enrichment (accessory gland) | mRNA enrichment (testis) | mRNA enrichment (ovary) |
|-------------|-------------|------------------------------|---------------------------|--------------------------------|-----------------------------------|--------------------------|-------------------------|
| FBgn0022213 | Cas         | CAS/CSE1 segregation protein | -2.50                     | 1.64                           | 0.30                              | 0.30                     | 1.80                    |
| FBgn0029704 | CG2982      | CG2982                       | -2.00                     | 2.18                           | 0.40                              | 0.40                     | 1.80                    |
| FBgn0022343 | CG3760      | CG3760                       | -1.60                     | 2.38                           | 1.90                              | 0.70                     | 1.60                    |
| FBgn0000360 | Cp38        | Chorion protein 38           | -4.60                     | 2.18                           | 0.00                              | 0.00                     | 1.30                    |
| FBgn0030268 | Klp10A      | Klp10A                       | -1.90                     | 1.71                           | 0.10                              | 3.10                     | 2.00                    |
| FBgn0027783 | SMC2        | SMC2                         | -3.10                     | 2.15                           | 0.20                              | 0.60                     | 3.00                    |



**Region 8**  $\{w^{1118} -1.5 \leq \log_2 (M/F) \leq 1.5; tud^1 \text{ progeny } \log_2 (M/F) > 1.5\}$

| Flybase ID  | Gene symbol | Protein name                                                | $\log_2 (M/F)$<br>$w^{1118}$ | $\log_2 (M/F)$<br><i>tudor</i><br>progeny | mRNA<br>enrichment<br>(accessory<br>gland) <sup>a</sup> | mRNA<br>enrichment<br>(testis) <sup>b</sup> | mRNA<br>enrichment<br>(ovary) <sup>c</sup> |
|-------------|-------------|-------------------------------------------------------------|------------------------------|-------------------------------------------|---------------------------------------------------------|---------------------------------------------|--------------------------------------------|
| FBgn0027885 | Aac11       | Aac11                                                       | -0.20                        | 2.61                                      | 2.90                                                    | 1.00                                        | 1.50                                       |
| FBgn0033504 | CAP         | CAP                                                         | 0.58                         | 1.60                                      | 2.20                                                    | 0.40                                        | 0.30                                       |
| FBgn0038395 | CG10407     | CG10407                                                     | 0.50                         | 1.69                                      | 0.10                                                    | 2.90                                        | 0.60                                       |
| FBgn0033021 | CG10417     | CG10417                                                     | -0.30                        | 1.65                                      | 0.50                                                    | 0.40                                        | 2.20                                       |
| FBgn0033448 | CG1623      | CG1623                                                      | 0.00                         | 2.44                                      | 2.70                                                    | 0.20                                        | 0.20                                       |
| FBgn0030321 | CG1703      | CG1703                                                      | -1.30                        | 2.04                                      | 1.20                                                    | 0.60                                        | 1.70                                       |
| FBgn0032775 | CG17544     | CG17544                                                     | 0.64                         | 2.93                                      | 0.40                                                    | 0.40                                        | 0.60                                       |
| FBgn0000299 | Cg25C       | Collagen type IV                                            | -0.10                        | 1.91                                      | 0.20                                                    | 0.20                                        | 0.70                                       |
| FBgn0031673 | CG31650     | CG31650                                                     | 0.46                         | 2.05                                      | 0.60                                                    | 2.00                                        | 1.90                                       |
| FBgn0052528 | CG32528     | CG32528                                                     | 0.49                         | 1.89                                      | 0.70                                                    | 0.30                                        | 1.40                                       |
| FBgn0028916 | CG33090     | CG33090                                                     | -0.20                        | 4.45                                      | 0.30/0.10                                               | 0.40/0.40                                   | 1.10/1.70                                  |
| FBgn0038516 | CG5840      | CG5840                                                      | 0.78                         | 1.60                                      | 0.10                                                    | 0.10                                        | 0.10                                       |
| FBgn0039229 | CG6995      | CG6995                                                      | 0.07                         | 1.99                                      | 1.40                                                    | 0.60                                        | 2.50                                       |
| FBgn0035878 | CG7182      | CG7182                                                      | -0.80                        | 2.09                                      | 0.50                                                    | 1.60                                        | 1.70                                       |
| FBgn0035510 | Cpr64Aa     | Cuticular protein<br>64Aa                                   | -1.40                        | 1.69                                      | 3.40                                                    | 0.30                                        | 0.30                                       |
| FBgn0015933 | didum       | dilute class<br>unconventional<br>myosin                    | -0.50                        | 2.47                                      | 1.80                                                    | 0.20                                        | 2.40                                       |
| FBgn0063485 | Lasp        | Lasp                                                        | 0.41                         | 2.27                                      | 0.30                                                    | 9.30                                        | 1.10                                       |
| FBgn0033179 | p47         | p47                                                         | -0.70                        | 3.08                                      | 0.90                                                    | 1.60                                        | 1.30                                       |
| FBgn0015288 | RpL22       | Ribosomal<br>protein L22                                    | -1.20                        | 1.69                                      | 2.40                                                    | 0.20                                        | 0.80                                       |
| FBgn0016983 | smid        | smallminded                                                 | -0.90                        | 2.23                                      | 0.60                                                    | 0.20                                        | 2.20                                       |
| FBgn0040091 | Ugt58Fa     | Ugt58Fa                                                     | -0.60                        | 3.40                                      | 1.80                                                    | 0.50                                        | 0.60                                       |
| FBgn0035917 | Zasp66      | Z band<br>alternatively<br>spliced PDZ-<br>motif protein 66 | 0.79                         | 2.25                                      | 0.40/0.80/<br>0.60                                      | 0.10/0.10/<br>0.10                          | 0.00/0.10/<br>0.10                         |
